# Supplementary material for: A Simulation Method Based on the Candidate Operation Strategies for the Combined Cooling, Heat, and Power (CCHP) System
Source: Hindawi journal article supplement (doi:10.1155/2021/8897267), 2021-02-28
Supplement: f1 [file 8897267.f1.docx]

**Ms. Ref. No.: MPE_8897267 R2**

Title: A Simulation Method Based on the Candidate Operation Strategies for the Combined Cooling Heat and Power System (CCHP)

Corresponding Author: Feng Zhu

Authors: Feng Zhu*, Jing-Qi Fu, Bin Zou, Wen-Rong Si

## Supplementary Materials

**S.1. The Lagrangian function and KKT condition of model 1-16**

The Lagrangian function of model 1 - 16 can be written as (the Lagrangian function of optimization problem is given in Ref. [25])

Set *x* = 1, it represented the purchasing electricity operation model. The optimal solution of the optimal model must satisfy the condition that the derivative of the Lagrangian function with respect to the decision variable is zero, that is,

(A1)

(A2)

(A3)

(A4)

(A5)

Set *x* = 0, it represented the selling electricity operation model. The derivative of the Lagrangian function with respect to the decision variable is the same as Equation A1, Equation A2, Equation A3, Equation A4, but Equation A5 is replaced by Equation A6.

(A6)

The KKT condition also requires the complementary relaxation condition, that is, when the inequality constraint is a strict inequality, the corresponding KT multiplier is zero. When the inequality constraint is an equation, the corresponding KT multiplier is a positive number.

**S.2. Testing the KKT conditions for the EC-FEL-L**

When EC-FEL-L strategy is used for the ECEL that locates on the left side of the boundary, the absorption chiller works in its minimal output, the KT multiplier of the Equation 13, is. And the electric chiller works between the minimum output and maximum output, the KT multipliers corresponded to Equation 12 are. The purchasing electricity from grid and the boiler work at their minimum, the corresponding KT multipliers are. The generator of the CCHP works between the minimum and maximum output, the KT multipliers are.

Substituting KT multiplications that is equal to zero into Equation A1-A5, it can be obtained as follows:

Because that the heat is wasted using EC-FEL-L, the inequality of the Equation 3 is true, so. It can be deduced that, this is impossible, so the KKT conditions is false. The strategy is not the optimal strategy.

Testing the KKT conditions for all strategies can used above method.

**S.3. Testing the KKT condition for the strategies of both cooling modes work simultaneously**

When both cooling modes work simultaneously, the KT multiplications, substituting these into Equation A4 and Equation A5, it can be obtained as

When the generator works between its minimal output and maximal output, any behavior such as start-up boiler or purchasing/selling electricity power makes KKT condition untenable. Only the generator works in its full capacity or minimal output, the KKT conditions may be true.

**S.4. Obtaining the Equation 23**

When the output of generator is between its minimal and maximal capacity, the, then the Equation A1 can be written as

(A7)

According to the Equations 5 and 6, there is

(A8)

Substituting Equation A8 into Equation A7, then Equation A7 can be expressed as

(A9)

According Equations 5-8, it can be obtained that

(A10)

where , variable f is defined by Equation 7.

Substituting Equation A10 into Equation A9, Equation A9 can be equivalently expressed as:

(A11)

Equation A11 is the Equation 23.

The range will be determined by the strategy, for example, the range of generator's output in the TC-AHPE-L is between the generator output in TC-FTL-L and that in TC-FEL-L.
